# Supplementary material
Source: publisher figshare collection journal article supplement (https://sage.figshare.com/ndownloader/files/22107720)
Supplement: Supplementary file 1 [file 22107720]

## **Appendix A**

### **TEACHER PRE QUESTIONS**

1. What are you looking forward to about participating in this study?
2. What familiarity do you have with the topic of human trafficking?
3. How would you describe comfort level with teaching this topic?
4. In what ways do you think this unit will help students?
5. Are there any ways in which you think this unit will hinder students?
6. What obstacles do you anticipate in teaching this unit?
7. What do you anticipate as being advantageous and/or beneficial for students in learning about this topic?
8. What experience do you have with teaching a social justice curriculum?
9. Is there anything else you would like to share about teaching a social justice curriculum?

### **TEACHER POST QUESTIONS**

1. How do you think teaching this unit went?
2. What was your overall perception of how the students received the information?
3. In what ways do you feel students are better equipped to recognize and combat human trafficking?
4. How familiar are you with human trafficking now that you have taught the unit?
5. After implementing this curriculum, are you now interested in expanding the conversation with your students about human trafficking?
6. What is your comfort level now with the topics associated with human trafficking?

## **Appendix B**

### **FOCUS GROUP QUESTIONS (STUDENTS)**

1. Now that you have finished your unit, what are your overall thoughts?
2. What did you know about human trafficking before this unit?
3. What did this unit teach you about human trafficking that you didn't already know?
4. What are some of the topics that the curriculum brought up that you would like to know more about?
